# Supplementary material for: Differences in Expression of Selected Interleukins in HIV-Infected Subjects Undergoing Antiretroviral Therapy
Source: MDPI journal article supplement (doi:10.3390/v14050997), 2022-05-07
Supplement: s1 [file s1]

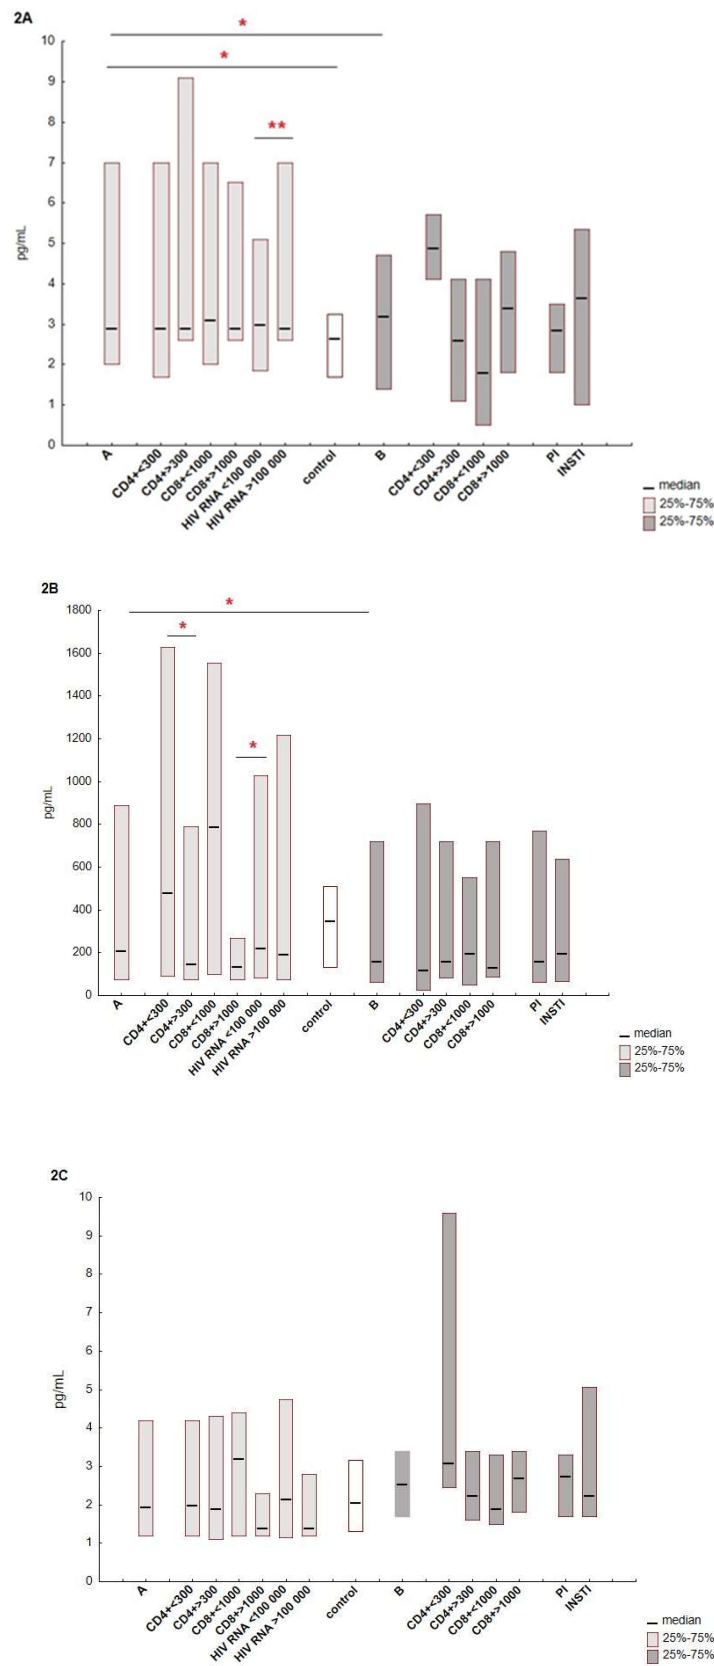

**Figure S1.** The level of IL-4 (2A), IL-7 (2B) and IL-15 (2C) in blood plasma obtained from HIV-infected men before and after cART depending on the HIV RNA viral load, CD4+ and CD8+ T cell count and on the therapy regimen (PI or INSTI) and control groups; The p-values were calculated using the U Man Whitney and Wilcoxon test; \*p<0.05; \*\*p<0.001
